# Supplementary material for: Association of late-onset postpartum depression of mothers with expressive language development during infancy and early childhood: the HBC study
Source: PeerJ journal article supplement (doi:10.7717/peerj.6566), 2019-03-06
Supplement: Supplemental_file_1.pdf [file Supplemental_file_1.pdf]

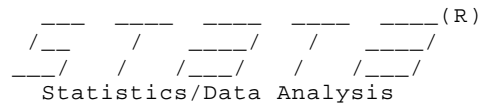

User: S Aoyagi  
Project: HBC study

```

name: <unnamed>
log: C:\stata_datafolder\20180528_HBC\peerJ_log_table1.smcl
log type: smcl
opened on: 23 Oct 2018, 15:59:33
    
```

```

1 .
2 . * =====
3 . * Table 1
4 . * =====
5 . tab1 male parit3 twin bf3 mopsyafdfor0 mopsyaxfor0 mopsyafdfor40 mopsyaxfor40
    
```

-> tabulation of male

| Gender of the child<br>0/female<br>1/male | Freq. | Percent | Cum.   |
|-------------------------------------------|-------|---------|--------|
| Female                                    | 478   | 49.33   | 49.33  |
| Male                                      | 491   | 50.67   | 100.00 |
| Total                                     | 969   | 100.00  |        |

-> tabulation of parit3

| Number of children born before<br>0/0 1/1<br>2/2+ | Freq. | Percent | Cum.   |
|---------------------------------------------------|-------|---------|--------|
| 0                                                 | 485   | 50.05   | 50.05  |
| 1                                                 | 363   | 37.46   | 87.51  |
| 2+                                                | 121   | 12.49   | 100.00 |
| Total                                             | 969   | 100.00  |        |

-> tabulation of twin

| Twins/multiple births | Freq. | Percent | Cum.   |
|-----------------------|-------|---------|--------|
| 0                     | 939   | 96.90   | 96.90  |
| 1                     | 30    | 3.10    | 100.00 |
| Total                 | 969   | 100.00  |        |

-> tabulation of bf3

| RECODE of bf | Freq. | Percent | Cum.   |
|--------------|-------|---------|--------|
| 0            | 55    | 5.68    | 5.68   |
| 1            | 223   | 23.01   | 28.69  |
| 2            | 691   | 71.31   | 100.00 |
| Total        | 969   | 100.00  |        |

-> tabulation of mopsyafdfor0

| Maternal LIFETIME Affect Disord BY the index preg (29600-99) | Freq. | Percent | Cum.   |
|--------------------------------------------------------------|-------|---------|--------|
| No                                                           | 870   | 89.78   | 89.78  |
| Yes                                                          | 99    | 10.22   | 100.00 |
| Total                                                        | 969   | 100.00  |        |

-> tabulation of mopsyanxfor0

| Maternal<br>LIFETIME<br>Anxiety<br>Disord BY<br>the index<br>preg<br>(30000/3004<br>1:30928) | Freq. | Percent | Cum.   |
|----------------------------------------------------------------------------------------------|-------|---------|--------|
| No                                                                                           | 934   | 96.39   | 96.39  |
| Yes                                                                                          | 35    | 3.61    | 100.00 |
| Total                                                                                        | 969   | 100.00  |        |

-> tabulation of mopsyafdfor40

| Maternal<br>LIFETIME<br>Affect<br>Disord<br>during<br>0-40M<br>(29600-99) | Freq. | Percent | Cum.   |
|---------------------------------------------------------------------------|-------|---------|--------|
| No                                                                        | 819   | 84.52   | 84.52  |
| Yes                                                                       | 150   | 15.48   | 100.00 |
| Total                                                                     | 969   | 100.00  |        |

-> tabulation of mopsyanxfor40

| Maternal<br>LIFETIME<br>Anxiety<br>Disord<br>during<br>0-40M<br>(30000/3004<br>1:30928) | Freq. | Percent | Cum.   |
|-----------------------------------------------------------------------------------------|-------|---------|--------|
| No                                                                                      | 916   | 94.53   | 94.53  |
| Yes                                                                                     | 53    | 5.47    | 100.00 |
| Total                                                                                   | 969   | 100.00  |        |

6 . sum bw ga moag01 moed01 faag01 faed01 bf

| Variable | Obs | Mean     | Std. Dev. | Min     | Max      |
|----------|-----|----------|-----------|---------|----------|
| bw       | 969 | 2943.937 | 436.2201  | 946     | 4286     |
| ga       | 969 | 38.9673  | 1.495451  | 30.14   | 42.14    |
| moag01   | 969 | 31.74589 | 5.024193  | 17.7358 | 44.55578 |
| moed01   | 969 | 13.94943 | 1.915175  | 9       | 23       |
| faag01   | 969 | 33.55073 | 5.762924  | 18.8501 | 53.4319  |
| faed01   | 969 | 14.25077 | 2.636768  | 9       | 26       |
| bf       | 969 | 9.801042 | 6.161373  | 0       | 23.07    |

7 . tab mopd3

| PPD<br>Early/Late<br>0/No PPD<br>1/Early<br>PPD(2-4w)<br>2/Late<br>PPD(5-12w) | Freq. | Percent | Cum.   |
|-------------------------------------------------------------------------------|-------|---------|--------|
| PPD-                                                                          | 823   | 84.93   | 84.93  |
| PPD_Early                                                                     | 103   | 10.63   | 95.56  |
| PPD_Late                                                                      | 43    | 4.44    | 100.00 |
| Total                                                                         | 969   | 100.00  |        |

8 . sum mlelt10 mlelt14 mlelt18 mlelt24 mlelt32 mlelt40

| Variable | Obs | Mean     | Std. Dev. | Min      | Max      |
|----------|-----|----------|-----------|----------|----------|
| mlelt10  | 914 | 48.11256 | 9.687399  | 24.11217 | 78.67344 |
| mlelt14  | 849 | 49.14698 | 10.4845   | 20       | 70.43153 |
| mlelt18  | 898 | 48.58352 | 9.543554  | 20       | 76.60195 |
| mlelt24  | 874 | 49.4513  | 9.935041  | 20       | 80       |
| mlelt32  | 849 | 49.27621 | 9.940606  | 20       | 80       |
| mlelt40  | 859 | 50.01843 | 10.28115  | 20       | 78.53828 |

9 .

10 . log c

```

name: <unnamed>
log: C:\stata_datafolder\20180528_HBC\peerJ_log_table1.smcl
log type: smcl
closed on: 23 Oct 2018, 15:59:34

```

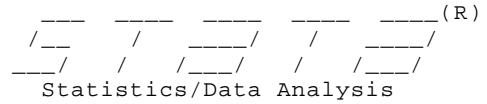

User: S Aoyagi  
Project: HBC study

```

name: <unnamed>
log: C:\stata_datafolder\20180528_HBC\peerJ_log_table2.smcl
log type: smcl
opened on: 23 Oct 2018, 15:59:34
    
```

```

1 .
2 . * =====
3 . * Table 2
4 . * =====
5 .
6 . *** Crude ***
7 . mi est: reg mlelt10 i.mopd3
    
```

```

Multiple-imputation estimates      Imputations      =      20
Linear regression                  Number of obs    =     969
                                   Average RVI      =     0.0367
                                   Largest FMI     =     0.0383
                                   Complete DF     =     966
DF adjustment:  Small sample      DF:      min    =     866.18
                                   avg            =     879.21
                                   max            =     886.21
Model F test:      Equal FMI      F(  2,  927.7)  =     0.51
Within VCE type:  OLS             Prob > F       =     0.5977
    
```

| mlelt10   | Coef.     | Std. Err. | t      | P> t  | [95% Conf. Interval] |          |
|-----------|-----------|-----------|--------|-------|----------------------|----------|
| mopd3     |           |           |        |       |                      |          |
| PPD_Early | .9404046  | 1.031426  | 0.91   | 0.362 | -1.083982            | 2.964792 |
| PPD_Late  | -.5758349 | 1.539434  | -0.37  | 0.708 | -3.597197            | 2.445527 |
| _cons     | 47.99015  | .3430813  | 139.88 | 0.000 | 47.3168              | 48.6635  |

```
8 . mi est: reg mlelt14 i.mopd3
```

```

Multiple-imputation estimates      Imputations      =      20
Linear regression                  Number of obs    =     969
                                   Average RVI      =     0.0739
                                   Largest FMI     =     0.0892
                                   Complete DF     =     966
DF adjustment:  Small sample      DF:      min    =     646.25
                                   avg            =     734.08
                                   max            =     843.52
Model F test:      Equal FMI      F(  2,  843.9)  =     1.13
Within VCE type:  OLS             Prob > F       =     0.3221
    
```

| mlelt14   | Coef.     | Std. Err. | t      | P> t  | [95% Conf. Interval] |          |
|-----------|-----------|-----------|--------|-------|----------------------|----------|
| mopd3     |           |           |        |       |                      |          |
| PPD_Early | -.3457374 | 1.121873  | -0.31  | 0.758 | -2.547728            | 1.856253 |
| PPD_Late  | -2.539464 | 1.71959   | -1.48  | 0.140 | -5.916123            | .837195  |
| _cons     | 49.23095  | .3801116  | 129.52 | 0.000 | 48.48468             | 49.97722 |

```
9 . mi est: reg mlelt18 i.mopd3
```

```

Multiple-imputation estimates      Imputations      =      20
Linear regression                  Number of obs    =     969
                                   Average RVI      =     0.0685
                                   Largest FMI     =     0.0976
                                   Complete DF     =     966
DF adjustment:  Small sample      DF:      min    =     610.38
                                   avg            =     758.83
                                   max            =     882.80
Model F test:      Equal FMI      F(  2,  807.4)  =     3.93
Within VCE type:  OLS             Prob > F       =     0.0199
    
```

| mlelt18   | Coef.     | Std. Err. | t      | P> t  | [95% Conf. Interval] |           |
|-----------|-----------|-----------|--------|-------|----------------------|-----------|
| mopd3     |           |           |        |       |                      |           |
| PPD_Early | .7976991  | 1.048625  | 0.76   | 0.447 | -1.261652            | 2.857051  |
| PPD_Late  | -4.092387 | 1.536894  | -2.66  | 0.008 | -7.109306            | -1.075469 |
| _cons     | 48.51407  | .3381539  | 143.47 | 0.000 | 47.8504              | 49.17775  |

10 . mi est: reg mlelt24 i.mopd3

```

Multiple-imputation estimates      Imputations      =      20
Linear regression                  Number of obs    =     969
                                   Average RVI      =     0.0925
                                   Largest FMI     =     0.0946
                                   Complete DF     =     966
DF adjustment:  Small sample      DF:      min    =     623.05
                                   avg            =     694.40
                                   max            =     764.35
Model F test:      Equal FMI      F( 2, 782.9)    =     7.40
Within VCE type:  OLS            Prob > F       =     0.0007
    
```

| mlelt24   | Coef.     | Std. Err. | t      | P> t  | [95% Conf. Interval] |           |
|-----------|-----------|-----------|--------|-------|----------------------|-----------|
| mopd3     |           |           |        |       |                      |           |
| PPD_Early | .3299884  | 1.074909  | 0.31   | 0.759 | -1.780466            | 2.440443  |
| PPD_Late  | -6.144574 | 1.623328  | -3.79  | 0.000 | -9.33243             | -2.956717 |
| _cons     | 49.49499  | .355594   | 139.19 | 0.000 | 48.79694             | 50.19305  |

11 . mi est: reg mlelt32 i.mopd3

```

Multiple-imputation estimates      Imputations      =      20
Linear regression                  Number of obs    =     969
                                   Average RVI      =     0.1320
                                   Largest FMI     =     0.1422
                                   Complete DF     =     966
DF adjustment:  Small sample      DF:      min    =     446.31
                                   avg            =     568.43
                                   max            =     711.95
Model F test:      Equal FMI      F( 2, 759.0)    =     5.03
Within VCE type:  OLS            Prob > F       =     0.0068
    
```

| mlelt32   | Coef.     | Std. Err. | t      | P> t  | [95% Conf. Interval] |           |
|-----------|-----------|-----------|--------|-------|----------------------|-----------|
| mopd3     |           |           |        |       |                      |           |
| PPD_Early | -.0231768 | 1.084079  | -0.02  | 0.983 | -2.151551            | 2.105197  |
| PPD_Late  | -5.185783 | 1.65727   | -3.13  | 0.002 | -8.441174            | -1.930391 |
| _cons     | 49.18169  | .375297   | 131.05 | 0.000 | 48.44412             | 49.91926  |

12 . mi est: reg mlelt40 i.mopd3

```

Multiple-imputation estimates      Imputations      =      20
Linear regression                  Number of obs    =     969
                                   Average RVI      =     0.0642
                                   Largest FMI     =     0.0729
                                   Complete DF     =     966
DF adjustment:  Small sample      DF:      min    =     718.07
                                   avg            =     764.16
                                   max            =     840.27
Model F test:      Equal FMI      F( 2, 835.5)    =     6.07
Within VCE type:  OLS            Prob > F       =     0.0024
    
```

| mlelt40   | Coef.     | Std. Err. | t      | P> t  | [95% Conf. Interval] |           |
|-----------|-----------|-----------|--------|-------|----------------------|-----------|
| mopd3     |           |           |        |       |                      |           |
| PPD_Early | -1.142563 | 1.117385  | -1.02  | 0.307 | -3.336296            | 1.051169  |
| PPD_Late  | -5.67262  | 1.66922   | -3.40  | 0.001 | -8.949634            | -2.395606 |
| _cons     | 50.13217  | .3672242  | 136.52 | 0.000 | 49.41138             | 50.85295  |

13 .  
 14 . \*\*\* Model 1 \*\*\*  
 15 . mi est: reg mlelt10 i.mopd3 mopsyafdfor0 mopsyanxfor0

|                                    |               |   |        |
|------------------------------------|---------------|---|--------|
| Multiple-imputation estimates      | Imputations   | = | 20     |
| Linear regression                  | Number of obs | = | 969    |
|                                    | Average RVI   | = | 0.0424 |
|                                    | Largest FMI   | = | 0.0579 |
|                                    | Complete DF   | = | 964    |
| DF adjustment: <b>Small sample</b> | DF: min       | = | 783.22 |
|                                    | avg           | = | 847.19 |
|                                    | max           | = | 879.76 |
| Model F test: <b>Equal FMI</b>     | F( 4, 938.6)  | = | 0.56   |
| Within VCE type: <b>OLS</b>        | Prob > F      | = | 0.6928 |

| mlelt10      | Coef.     | Std. Err. | t      | P> t  | [95% Conf. Interval] |          |
|--------------|-----------|-----------|--------|-------|----------------------|----------|
| mopd3        |           |           |        |       |                      |          |
| PPD_Early    | 1.098543  | 1.04847   | 1.05   | 0.295 | -.9593552            | 3.156441 |
| PPD_Late     | -.5322518 | 1.543748  | -0.34  | 0.730 | -3.562111            | 2.497607 |
| mopsyafdfor0 | -.6912348 | 1.081106  | -0.64  | 0.523 | -2.813136            | 1.430667 |
| mopsyanxfor0 | -1.326611 | 1.750182  | -0.76  | 0.449 | -4.762214            | 2.108993 |
| _cons        | 48.08994  | .3573221  | 134.58 | 0.000 | 47.38862             | 48.79127 |

16 . mi est: reg mlelt14 i.mopd3 mopsyafdfor0 mopsyanxfor0

|                                    |               |   |        |
|------------------------------------|---------------|---|--------|
| Multiple-imputation estimates      | Imputations   | = | 20     |
| Linear regression                  | Number of obs | = | 969    |
|                                    | Average RVI   | = | 0.1108 |
|                                    | Largest FMI   | = | 0.1929 |
|                                    | Complete DF   | = | 964    |
| DF adjustment: <b>Small sample</b> | DF: min       | = | 315.31 |
|                                    | avg           | = | 628.71 |
|                                    | max           | = | 803.94 |
| Model F test: <b>Equal FMI</b>     | F( 4, 829.2)  | = | 1.94   |
| Within VCE type: <b>OLS</b>        | Prob > F      | = | 0.1019 |

| mlelt14      | Coef.     | Std. Err. | t      | P> t  | [95% Conf. Interval] |           |
|--------------|-----------|-----------|--------|-------|----------------------|-----------|
| mopd3        |           |           |        |       |                      |           |
| PPD_Early    | -.4194166 | 1.140395  | -0.37  | 0.713 | -2.65792             | 1.819087  |
| PPD_Late     | -2.695264 | 1.724285  | -1.56  | 0.119 | -6.081418            | .6908895  |
| mopsyafdfor0 | 1.404217  | 1.27367   | 1.10   | 0.271 | -1.101749            | 3.910182  |
| mopsyanxfor0 | -4.347498 | 1.92188   | -2.26  | 0.024 | -8.121271            | -.5737255 |
| _cons        | 49.25926  | .3918392  | 125.71 | 0.000 | 48.49002             | 50.02849  |

17 . mi est: reg mlelt18 i.mopd3 mopsyafdfor0 mopsyanxfor0

```

Multiple-imputation estimates      Imputations      =      20
Linear regression                  Number of obs    =     969
                                   Average RVI      =     0.0666
                                   Largest FMI     =     0.0938
                                   Complete DF     =     964
DF adjustment:  Small sample    DF:      min    =     625.37
                                   avg              =     761.32
                                   max              =     860.92
Model F test:      Equal FMI    F( 4, 900.6) =     2.43
Within VCE type:  OLS          Prob > F       =     0.0461
    
```

| mlelt18      | Coef.     | Std. Err. | t      | P> t  | [95% Conf. Interval] |          |
|--------------|-----------|-----------|--------|-------|----------------------|----------|
| mopd3        |           |           |        |       |                      |          |
| PPD_Early    | 1.015108  | 1.061202  | 0.96   | 0.339 | -1.068842            | 3.099058 |
| PPD_Late     | -4.014289 | 1.539145  | -2.61  | 0.009 | -7.035618            | -.99296  |
| mopsyafdfor0 | -1.095511 | 1.065228  | -1.03  | 0.304 | -3.186258            | .9952364 |
| mopsyanxfor0 | -1.157566 | 1.746271  | -0.66  | 0.508 | -4.586343            | 2.27121  |
| _cons        | 48.64124  | .3519225  | 138.22 | 0.000 | 47.95051             | 49.33196 |

18 . mi est: reg mlelt24 i.mopd3 mopsyafdfor0 mopsyanxfor0

```

Multiple-imputation estimates      Imputations      =      20
Linear regression                  Number of obs    =     969
                                   Average RVI      =     0.0689
                                   Largest FMI     =     0.0954
                                   Complete DF     =     964
DF adjustment:  Small sample    DF:      min    =     618.80
                                   avg              =     773.56
                                   max              =     904.60
Model F test:      Equal FMI    F( 4, 915.7) =     5.48
Within VCE type:  OLS          Prob > F       =     0.0002
    
```

| mlelt24      | Coef.     | Std. Err. | t      | P> t  | [95% Conf. Interval] |           |
|--------------|-----------|-----------|--------|-------|----------------------|-----------|
| mopd3        |           |           |        |       |                      |           |
| PPD_Early    | .7427424  | 1.086062  | 0.68   | 0.494 | -1.389569            | 2.875054  |
| PPD_Late     | -6.009584 | 1.622652  | -3.70  | 0.000 | -9.196156            | -2.823012 |
| mopsyafdfor0 | -1.973772 | 1.09371   | -1.80  | 0.071 | -4.120277            | .1727325  |
| mopsyanxfor0 | -2.684357 | 1.765034  | -1.52  | 0.129 | -6.148656            | .7799425  |
| _cons        | 49.74374  | .3671233  | 135.50 | 0.000 | 49.02308             | 50.4644   |

19 . mi est: reg mlelt32 i.mopd3 mopsyafdfor0 mopsyanxfor0

```

Multiple-imputation estimates      Imputations      =      20
Linear regression                  Number of obs    =     969
                                   Average RVI      =     0.1021
                                   Largest FMI     =     0.1362
                                   Complete DF     =     964
DF adjustment:  Small sample    DF:      min    =     465.29
                                   avg              =     665.83
                                   max              =     876.93
Model F test:      Equal FMI    F( 4, 894.1) =     6.30
Within VCE type:  OLS          Prob > F       =     0.0001
    
```

| mlelt32      | Coef.     | Std. Err. | t      | P> t  | [95% Conf. Interval] |           |
|--------------|-----------|-----------|--------|-------|----------------------|-----------|
| mopd3        |           |           |        |       |                      |           |
| PPD_Early    | .5517589  | 1.09028   | 0.51   | 0.613 | -1.588751            | 2.692269  |
| PPD_Late     | -5.027259 | 1.649829  | -3.05  | 0.002 | -8.268131            | -1.786387 |
| mopsyafdfor0 | -2.513651 | 1.104683  | -2.28  | 0.023 | -4.681782            | -.34552   |
| mopsyaxfor0  | -4.82049  | 1.803565  | -2.67  | 0.008 | -8.361305            | -1.279675 |
| _cons        | 49.54447  | .3853658  | 128.56 | 0.000 | 48.78719             | 50.30174  |

20 . mi est: reg mlelt40 i.mopd3 mopsyafdfor0 mopsyaxfor0

```

Multiple-imputation estimates      Imputations      =      20
Linear regression                  Number of obs    =     969
                                   Average RVI      =     0.0674
                                   Largest FMI     =     0.0756
                                   Complete DF    =     964
DF adjustment:  Small sample      DF:      min    =    704.90
                                   avg          =    762.15
                                   max          =    842.36
Model F test:      Equal FMI      F( 4, 901.8)    =     3.30
Within VCE type:  OLS              Prob > F        =     0.0107
    
```

| mlelt40      | Coef.     | Std. Err. | t      | P> t  | [95% Conf. Interval] |           |
|--------------|-----------|-----------|--------|-------|----------------------|-----------|
| mopd3        |           |           |        |       |                      |           |
| PPD_Early    | -1.071272 | 1.13045   | -0.95  | 0.344 | -3.290543            | 1.147999  |
| PPD_Late     | -5.688264 | 1.67439   | -3.40  | 0.001 | -8.975494            | -2.401034 |
| mopsyafdfor0 | -.0297501 | 1.172788  | -0.03  | 0.980 | -2.332326            | 2.272826  |
| mopsyaxfor0  | -1.891433 | 1.848599  | -1.02  | 0.307 | -5.519833            | 1.736967  |
| _cons        | 50.19664  | .3831647  | 131.01 | 0.000 | 49.44451             | 50.94877  |

21 . mi est, vartable dftable

```

Multiple-imputation estimates      Imputations      =      20
Linear regression
    
```

Variance information

|              | Imputation variance |         |         | RVI     | FMI     | Relative efficiency |
|--------------|---------------------|---------|---------|---------|---------|---------------------|
|              | Within              | Between | Total   |         |         |                     |
| mopd3        |                     |         |         |         |         |                     |
| PPD_Early    | 1.19213             | .081704 | 1.27792 | .071963 | .067715 | .996626             |
| PPD_Late     | 2.60619             | .187995 | 2.80358 | .075741 | .07104  | .996461             |
| mopsyafdfor0 | 1.27245             | .098074 | 1.37543 | .080929 | .075571 | .996236             |
| mopsyaxfor0  | 3.2682              | .142018 | 3.41732 | .045627 | .043922 | .997809             |
| _cons        | .138885             | .007553 | .146815 | .057099 | .054419 | .997286             |

```

Multiple-imputation estimates      Imputations      =      20
Linear regression                  Number of obs    =     969
                                   Average RVI      =     0.0674
                                   Largest FMI     =     0.0756
                                   Complete DF    =     964
DF adjustment:  Small sample      DF:      min    =    704.90
                                   avg          =    762.15
                                   max          =    842.36
Model F test:      Equal FMI      F( 4, 901.8)    =     3.30
Within VCE type:  OLS              Prob > F        =     0.0107
    
```



| mlelt40      | Coef.     | Std. Err. | t      | P> t  | DF    | % Increase<br>Std. Err. |
|--------------|-----------|-----------|--------|-------|-------|-------------------------|
| mopd3        |           |           |        |       |       |                         |
| PPD_Early    | -1.071272 | 1.13045   | -0.95  | 0.344 | 739.9 | 3.54                    |
| PPD_Late     | -5.688264 | 1.67439   | -3.40  | 0.001 | 725.1 | 3.72                    |
| mopsyafdfor0 | -.0297501 | 1.172788  | -0.03  | 0.980 | 704.9 | 3.97                    |
| mopsyaxfor0  | -1.891433 | 1.848599  | -1.02  | 0.307 | 842.4 | 2.26                    |
| _cons        | 50.19664  | .3831647  | 131.01 | 0.000 | 798.5 | 2.82                    |

```

22 .
23 . *** Model 2***
24 . mi est, saving(es): reg mlelt10 i.mopd3 male i.parity3 twin bw ga moag01 moed01 faag01 faed01

```

|                                    |               |   |        |
|------------------------------------|---------------|---|--------|
| Multiple-imputation estimates      | Imputations   | = | 20     |
| Linear regression                  | Number of obs | = | 969    |
|                                    | Average RVI   | = | 0.0496 |
|                                    | Largest FMI   | = | 0.1032 |
|                                    | Complete DF   | = | 953    |
| DF adjustment: <b>Small sample</b> | DF: min       | = | 581.86 |
|                                    | avg           | = | 801.92 |
|                                    | max           | = | 893.74 |
| Model F test: <b>Equal FMI</b>     | F( 15, 943.3) | = | 3.86   |
| Within VCE type: <b>OLS</b>        | Prob > F      | = | 0.0000 |

| mlelt10      | Coef.     | Std. Err. | t     | P> t  | [95% Conf. Interval] |           |
|--------------|-----------|-----------|-------|-------|----------------------|-----------|
| mopd3        |           |           |       |       |                      |           |
| PPD_Early    | .8710345  | 1.041762  | 0.84  | 0.403 | -1.173774            | 2.915843  |
| PPD_Late     | .1020284  | 1.528052  | 0.07  | 0.947 | -2.897155            | 3.101212  |
| male         | -1.717191 | .6307713  | -2.72 | 0.007 | -2.955178            | -.4792033 |
| parity3      |           |           |       |       |                      |           |
| 1            | -.1495385 | .702698   | -0.21 | 0.832 | -1.528897            | 1.22982   |
| 2+           | -1.323557 | 1.042312  | -1.27 | 0.205 | -3.36952             | .7224057  |
| twin         | -2.534914 | 1.896175  | -1.34 | 0.182 | -6.256433            | 1.186606  |
| bw           | .0026749  | .0009165  | 2.92  | 0.004 | .0008761             | .0044736  |
| ga           | .5415636  | .2787435  | 1.94  | 0.052 | -.0057163            | 1.088844  |
| moag01       | .1694629  | .0978121  | 1.73  | 0.084 | -.0225494            | .3614751  |
| moed01       | .2016158  | .1853392  | 1.09  | 0.277 | -.1621588            | .5653905  |
| faag01       | -.1903871 | .0825895  | -2.31 | 0.021 | -.3524945            | -.0282796 |
| faed01       | -.1700985 | .1358444  | -1.25 | 0.211 | -.4367096            | .0965126  |
| mopsyafdfor0 | -.4246509 | 1.062539  | -0.40 | 0.690 | -2.510149            | 1.660847  |
| mopsyaxfor0  | -.9252147 | 1.722562  | -0.54 | 0.591 | -4.306646            | 2.456217  |
| bf           | .0490565  | .0530119  | 0.93  | 0.355 | -.0550356            | .1531487  |
| _cons        | 20.37495  | 10.32898  | 1.97  | 0.049 | .0883216             | 40.66158  |

```

25 . erase es.ster
26 . mi est, saving(es): reg mlelt14 i.mopd3 male i.parity3 twin bw ga moag01 moed01 faag01 faed01

```

|                                    |               |   |        |
|------------------------------------|---------------|---|--------|
| Multiple-imputation estimates      | Imputations   | = | 20     |
| Linear regression                  | Number of obs | = | 969    |
|                                    | Average RVI   | = | 0.1142 |
|                                    | Largest FMI   | = | 0.2044 |
|                                    | Complete DF   | = | 953    |
| DF adjustment: <b>Small sample</b> | DF: min       | = | 291.28 |
|                                    | avg           | = | 600.45 |
|                                    | max           | = | 831.32 |
| Model F test: <b>Equal FMI</b>     | F( 15, 916.2) | = | 4.77   |
| Within VCE type: <b>OLS</b>        | Prob > F      | = | 0.0000 |

| mlelt14      | Coef.     | Std. Err. | t     | P> t  | [95% Conf. Interval] |           |
|--------------|-----------|-----------|-------|-------|----------------------|-----------|
| mopd3        |           |           |       |       |                      |           |
| PPD_Early    | -.3269686 | 1.12844   | -0.29 | 0.772 | -2.542179            | 1.888242  |
| PPD_Late     | -1.345869 | 1.6818    | -0.80 | 0.424 | -4.648182            | 1.956443  |
| male         | -2.298936 | .7077087  | -3.25 | 0.001 | -3.689086            | -.9087865 |
| parit3       |           |           |       |       |                      |           |
| 1            | .6949351  | .751933   | 0.92  | 0.356 | -.7809753            | 2.170846  |
| 2+           | 1.1288    | 1.161984  | 0.97  | 0.332 | -1.153933            | 3.411533  |
| twin         | -7.493737 | 2.089373  | -3.59 | 0.000 | -11.59602            | -3.391457 |
| bw           | .0028484  | .0010058  | 2.83  | 0.005 | .0008737             | .0048232  |
| ga           | .2817263  | .310073   | 0.91  | 0.364 | -.3276334            | .8910861  |
| moag01       | .0150412  | .106916   | 0.14  | 0.888 | -.1949157            | .2249981  |
| moed01       | .2261869  | .2039137  | 1.11  | 0.268 | -.1742065            | .6265802  |
| faag01       | -.148341  | .0936987  | -1.58 | 0.114 | -.3324945            | .0358124  |
| faed01       | -.2067498 | .1479416  | -1.40 | 0.163 | -.4971507            | .083651   |
| mopsyafdfor0 | 1.529316  | 1.252345  | 1.22  | 0.223 | -.9354762            | 3.994109  |
| mopsyaxfor0  | -4.154759 | 1.891308  | -2.20 | 0.028 | -7.8691              | -.4404168 |
| bf           | .0741398  | .0577437  | 1.28  | 0.200 | -.0392812            | .1875607  |
| _cons        | 34.36563  | 11.32666  | 3.03  | 0.003 | 12.10618             | 56.62508  |

27 . erase es.ster

28 . mi est, saving(es): reg mlelt18 i.mopd3 male i.parit3 twin bw ga moag01 moed01 faag01 faed01

|                                    |               |   |        |
|------------------------------------|---------------|---|--------|
| Multiple-imputation estimates      | Imputations   | = | 20     |
| Linear regression                  | Number of obs | = | 969    |
|                                    | Average RVI   | = | 0.0653 |
|                                    | Largest FMI   | = | 0.1179 |
|                                    | Complete DF   | = | 953    |
| DF adjustment: <b>Small sample</b> | DF: min       | = | 525.28 |
|                                    | avg           | = | 755.79 |
|                                    | max           | = | 866.27 |
| Model F test: <b>Equal FMI</b>     | F( 15, 937.9) | = | 4.83   |
| Within VCE type: <b>OLS</b>        | Prob > F      | = | 0.0000 |

| mlelt18      | Coef.     | Std. Err. | t     | P> t  | [95% Conf. Interval] |           |
|--------------|-----------|-----------|-------|-------|----------------------|-----------|
| mopd3        |           |           |       |       |                      |           |
| PPD_Early    | 1.050064  | 1.052021  | 1.00  | 0.319 | -1.016064            | 3.116192  |
| PPD_Late     | -3.390613 | 1.522403  | -2.23 | 0.026 | -6.379423            | -.4018026 |
| male         | -2.912179 | .6234488  | -4.67 | 0.000 | -4.135902            | -1.688455 |
| parit3       |           |           |       |       |                      |           |
| 1            | -.4692415 | .685234   | -0.68 | 0.494 | -1.814204            | .8757207  |
| 2+           | -.1629384 | 1.020839  | -0.16 | 0.873 | -2.1667              | 1.840824  |
| twin         | -1.955533 | 1.949862  | -1.00 | 0.316 | -5.786019            | 1.874953  |
| bw           | .0034592  | .0008992  | 3.85  | 0.000 | .0016943             | .0052241  |
| ga           | .1014611  | .2705559  | 0.38  | 0.708 | -.4296386            | .6325608  |
| moag01       | .1058792  | .0955564  | 1.11  | 0.268 | -.081692             | .2934504  |
| moed01       | .3460992  | .1849333  | 1.87  | 0.062 | -.016976             | .7091744  |
| faag01       | -.1430489 | .0820183  | -1.74 | 0.082 | -.3040663            | .0179685  |
| faed01       | -.0394917 | .1346678  | -0.29 | 0.769 | -.3038257            | .2248423  |
| mopsyafdfor0 | -.8939198 | 1.045057  | -0.86 | 0.393 | -2.945169            | 1.157329  |
| mopsyaxfor0  | -.9541358 | 1.716072  | -0.56 | 0.578 | -4.323843            | 2.415571  |
| bf           | .0931718  | .0510348  | 1.83  | 0.068 | -.0070032            | .1933468  |
| _cons        | 32.43671  | 9.953751  | 3.26  | 0.001 | 12.89504             | 51.97839  |

29 . erase es.ster

30 . mi est, saving(es): reg mlelt24 i.mopd3 male i.parity3 twin bw ga moag01 moed01 faag01 faed01

```

Multiple-imputation estimates          Imputations          =          20
Linear regression                     Number of obs        =          969
                                       Average RVI          =          0.0787
                                       Largest FMI         =          0.1182
                                       Complete DF        =          953
DF adjustment:  Small sample        DF:      min         =          524.19
                                       avg               =          725.21
                                       max               =          903.94
Model F test:      Equal FMI        F( 15, 934.0)      =          6.06
Within VCE type:  OLS              Prob > F           =          0.0000
    
```

| mlelt24      | Coef.     | Std. Err. | t     | P> t  | [95% Conf. Interval] |           |
|--------------|-----------|-----------|-------|-------|----------------------|-----------|
| mopd3        |           |           |       |       |                      |           |
| PPD_Early    | .8109585  | 1.069142  | 0.76  | 0.448 | -1.288161            | 2.910078  |
| PPD_Late     | -5.585423 | 1.584617  | -3.52 | 0.000 | -8.697082            | -2.473763 |
| male         | -3.566372 | .655825   | -5.44 | 0.000 | -4.854144            | -2.278599 |
| parity3      |           |           |       |       |                      |           |
| 1            | -.6071734 | .7196928  | -0.84 | 0.399 | -2.020247            | .8059005  |
| 2+           | -.746756  | 1.03856   | -0.72 | 0.472 | -2.785026            | 1.291514  |
| twin         |           |           |       |       |                      |           |
| bw           | .0035209  | .0009271  | 3.80  | 0.000 | .0017013             | .0053405  |
| ga           | -.0076503 | .2792567  | -0.03 | 0.978 | -.5558517            | .5405512  |
| moag01       | .0841679  | .0995211  | 0.85  | 0.398 | -.1112253            | .2795611  |
| moed01       | .3799466  | .1905802  | 1.99  | 0.047 | .0057787             | .7541145  |
| faag01       | -.1068536 | .086834   | -1.23 | 0.219 | -.2774389            | .0637318  |
| faed01       | .1358571  | .1394786  | 0.97  | 0.330 | -.1379447            | .4096589  |
| mopsyafdfor0 | -1.812845 | 1.069024  | -1.70 | 0.090 | -3.910975            | .2852847  |
| mopsyanxfor0 | -2.422254 | 1.73237   | -1.40 | 0.162 | -5.822703            | .9781951  |
| bf           | .1022363  | .054542   | 1.87  | 0.061 | -.0049107            | .2093834  |
| _cons        | 34.42886  | 10.15466  | 3.39  | 0.001 | 14.49593             | 54.36179  |

31 . erase es.ster

32 . mi est, saving(es): reg mlelt32 i.mopd3 male i.parity3 twin bw ga moag01 moed01 faag01 faed01

```

Multiple-imputation estimates          Imputations          =          20
Linear regression                     Number of obs        =          969
                                       Average RVI          =          0.1182
                                       Largest FMI         =          0.1964
                                       Complete DF        =          953
DF adjustment:  Small sample        DF:      min         =          306.72
                                       avg               =          572.72
                                       max               =          849.42
Model F test:      Equal FMI        F( 15, 918.4)      =          7.10
Within VCE type:  OLS              Prob > F           =          0.0000
    
```

| mlelt32   | Coef.     | Std. Err. | t     | P> t  | [95% Conf. Interval] |           |
|-----------|-----------|-----------|-------|-------|----------------------|-----------|
| mopd3     |           |           |       |       |                      |           |
| PPD_Early | .4888278  | 1.067324  | 0.46  | 0.647 | -1.606734            | 2.58439   |
| PPD_Late  | -4.93519  | 1.59766   | -3.09 | 0.002 | -8.073268            | -1.797112 |
| male      | -3.003931 | .648895   | -4.63 | 0.000 | -4.277868            | -1.729995 |
| parity3   |           |           |       |       |                      |           |
| 1         | -1.339164 | .7391503  | -1.81 | 0.071 | -2.791551            | .1132217  |
| 2+        | -2.119378 | 1.069735  | -1.98 | 0.048 | -4.219867            | -.0188903 |
| twin      |           |           |       |       |                      |           |
| bw        | 1.564748  | 2.005608  | 0.78  | 0.436 | -2.375361            | 5.504858  |
| ga        | .0021925  | .000951   | 2.31  | 0.021 | .0003252             | .0040599  |
| moag01    | .2311157  | .2999949  | 0.77  | 0.442 | -.3591298            | .8213611  |
| moed01    | .0530502  | .1001627  | 0.53  | 0.597 | -.1436388            | .2497392  |

|              |           |          |       |       |           |           |
|--------------|-----------|----------|-------|-------|-----------|-----------|
| moed01       | .5514402  | .2006255 | 2.75  | 0.006 | .1569255  | .9459549  |
| faag01       | -.0179381 | .0862527 | -0.21 | 0.835 | -.1873589 | .1514827  |
| faed01       | .3630529  | .1424136 | 2.55  | 0.011 | .0833532  | .6427526  |
| mopsyafdfor0 | -2.420992 | 1.071761 | -2.26 | 0.024 | -4.524601 | -.3173817 |
| mopsyaxfor0  | -4.287772 | 1.767952 | -2.43 | 0.016 | -7.759559 | -.8159847 |
| bf           | .0830893  | .053658  | 1.55  | 0.122 | -.0222812 | .1884597  |
| _cons        | 21.53501  | 10.98398 | 1.96  | 0.051 | -.0784922 | 43.14851  |

33 . erase es.ster

34 . mi est, saving(es): reg mlelt40 i.mopd3 male i.parity3 twin bw ga moag01 moed01 faag01 faed01

```

Multiple-imputation estimates      Imputations      =      20
Linear regression                 Number of obs    =     969
                                   Average RVI      =     0.0802
                                   Largest FMI     =     0.1030
                                   Complete DF    =     953
DF adjustment:  Small sample      DF:      min    =     582.47
                                   avg          =     709.70
                                   max          =     804.21
Model F test:      Equal FMI      F( 15, 932.1)  =     9.50
Within VCE type:  OLS            Prob > F      =     0.0000
    
```

| mlelt40      | Coef.     | Std. Err. | t     | P> t  | [95% Conf. Interval] |           |
|--------------|-----------|-----------|-------|-------|----------------------|-----------|
| mopd3        |           |           |       |       |                      |           |
| PPD_Early    | -1.214338 | 1.078871  | -1.13 | 0.261 | -3.332364            | .9036883  |
| PPD_Late     | -5.76544  | 1.588495  | -3.63 | 0.000 | -8.883975            | -2.646905 |
| male         | -3.593282 | .6580216  | -5.46 | 0.000 | -4.885093            | -2.301472 |
| parity3      |           |           |       |       |                      |           |
| 1            | -1.893667 | .7305039  | -2.59 | 0.010 | -3.328004            | -.4593308 |
| 2+           | -3.436261 | 1.071496  | -3.21 | 0.001 | -5.53963             | -1.332891 |
| twin         | 3.256418  | 2.018897  | 1.61  | 0.107 | -.7087864            | 7.221623  |
| bw           | .002997   | .0009584  | 3.13  | 0.002 | .0011152             | .0048787  |
| ga           | .2741446  | .2836192  | 0.97  | 0.334 | -.2826378            | .8309269  |
| moag01       | .1421478  | .1004962  | 1.41  | 0.158 | -.0551447            | .3394402  |
| moed01       | .6772575  | .1963483  | 3.45  | 0.001 | .2916222             | 1.062893  |
| faag01       | -.0586156 | .0862234  | -0.68 | 0.497 | -.227912             | .1106808  |
| faed01       | .3781399  | .1423462  | 2.66  | 0.008 | .0986755             | .6576042  |
| mopsyafdfor0 | .1321001  | 1.11257   | 0.12  | 0.906 | -2.052416            | 2.316616  |
| mopsyaxfor0  | -1.107819 | 1.758155  | -0.63 | 0.529 | -4.558934            | 2.343296  |
| bf           | .1334867  | .0539869  | 2.47  | 0.014 | .0274929             | .2394805  |
| _cons        | 14.83287  | 10.35255  | 1.43  | 0.152 | -5.490361            | 35.1561   |

35 . erase es.ster

36 .

37 . log c

```

name: <unnamed>
log: C:\stata_datafolder\20180528_HBC\peerJ_log_table2.smcl
log type: smcl
closed on: 23 Oct 2018, 16:00:06
    
```



User: S Aoyagi  
Project: HBC study

```

name: <unnamed>
log: C:\stata_datafolder\20180528_HBC\peerJ_log_table3.smcl
log type: smcl
opened on: 23 Oct 2018, 16:00:09
    
```

```

1 .
2 . * =====
3 . * Table 3
4 . * =====
5 . mixed mlelt c.t##i.mopd3 male i.parity3 twin bw ga ///
> moag01 moed01 faag01 faed01 mopsyafdfor0 mopsyaxfor0 c.bf ///
> if t==10 | t==14 | t==18 | t==24 | t==32 | t==40 || id: t, cov(uns) vce(cluster moid) var
    
```

Performing EM optimization:

Performing gradient-based optimization:

```

Iteration 0: log pseudolikelihood = -18680.201
Iteration 1: log pseudolikelihood = -18680.199
Iteration 2: log pseudolikelihood = -18680.199
    
```

Computing standard errors:

```

Mixed-effects regression      Number of obs      =      5,243
Group variable: id           Number of groups   =      969

                                Obs per group:
                                min =          1
                                avg =          5.4
                                max =          6

                                Wald chi2(18)      =      164.83
                                Prob > chi2        =      0.0000
Log pseudolikelihood = -18680.199
    
```

(Std. Err. adjusted for 880 clusters in moid)

| mlelt        | Coef.     | Robust Std. Err. | z     | P> z  | [95% Conf. Interval] |           |
|--------------|-----------|------------------|-------|-------|----------------------|-----------|
| t            | .0593437  | .0156311         | 3.80  | 0.000 | .0287072             | .0899801  |
| mopd3        |           |                  |       |       |                      |           |
| PPD_Early    | 1.623658  | 1.138981         | 1.43  | 0.154 | -.6087032            | 3.85602   |
| PPD_Late     | .8579228  | 1.827198         | 0.47  | 0.639 | -2.723319            | 4.439164  |
| mopd3#c.t    |           |                  |       |       |                      |           |
| PPD_Early    | -.0576985 | .0393408         | -1.47 | 0.142 | -.1348049            | .019408   |
| PPD_Late     | -.1872499 | .0615015         | -3.04 | 0.002 | -.3077907            | -.0667092 |
| male         | -2.730121 | .4413328         | -6.19 | 0.000 | -3.595117            | -1.865124 |
| parity3      |           |                  |       |       |                      |           |
| 1            | -.4705155 | .4952003         | -0.95 | 0.342 | -1.44109             | .5000592  |
| 2+           | -.7684406 | .6768341         | -1.14 | 0.256 | -2.095011            | .5581298  |
| twin         | -1.773174 | 1.518988         | -1.17 | 0.243 | -4.750335            | 1.203987  |
| bw           | .0030259  | .0006434         | 4.70  | 0.000 | .0017649             | .004287   |
| ga           | .2471392  | .1930158         | 1.28  | 0.200 | -.1311649            | .6254434  |
| moag01       | .1048442  | .0720179         | 1.46  | 0.145 | -.0363083            | .2459967  |
| moed01       | .351887   | .1219185         | 2.89  | 0.004 | .1129311             | .5908428  |
| faag01       | -.1322044 | .0598779         | -2.21 | 0.027 | -.249563             | -.0148459 |
| faed01       | .0334222  | .0977545         | 0.34  | 0.732 | -.1581731            | .2250175  |
| mopsyafdfor0 | -.5841811 | .821888          | -0.71 | 0.477 | -2.195052            | 1.02669   |
| mopsyaxfor0  | -2.303599 | 1.301228         | -1.77 | 0.077 | -4.85396             | .2467616  |
| bf           | .0837677  | .0359467         | 2.33  | 0.020 | .0133135             | .1542219  |
| _cons        | 25.90626  | 7.19946          | 3.60  | 0.000 | 11.79558             | 40.01695  |

| Random-effects Parameters | Estimate  | Robust Std. Err. | [95% Conf. Interval] |          |
|---------------------------|-----------|------------------|----------------------|----------|
| <b>id: Unstructured</b>   |           |                  |                      |          |
| var(t)                    | .0896359  | .0089564         | .0736936             | .1090269 |
| var(_cons)                | 67.34337  | 5.721422         | 57.01349             | 79.54484 |
| cov(t,_cons)              | -1.722532 | .2061632         | -2.126604            | -1.31846 |
| var(Residual)             | 47.69364  | 1.405268         | 45.01739             | 50.529   |

```

6 .
7 . mixed mlelt c.t#c.t##i.mopd3 male i.parit3 twin bw ga ///
> moag01 moed01 faag01 faed01 mopsyaafdfor0 mopsyanxfor0 c.bf ///
> if t==10 | t==14 | t==18 | t==24 | t==32 | t==40 || id: t, cov(uns) vce(cluster moid) var

```

Performing EM optimization:

Performing gradient-based optimization:

```

Iteration 0: log pseudolikelihood = -18677.454
Iteration 1: log pseudolikelihood = -18677.452
Iteration 2: log pseudolikelihood = -18677.452

```

Computing standard errors:

```

Mixed-effects regression      Number of obs      =      5,243
Group variable: id           Number of groups   =      969

```

```

Obs per group:
min =      1
avg  =      5.4
max  =      6

```

```

Log pseudolikelihood = -18677.452      Wald chi2(21)      =      167.57
                                          Prob > chi2        =      0.0000

```

(Std. Err. adjusted for 880 clusters in moid)

| mlelt         | Coef.     | Robust Std. Err. | z     | P> z  | [95% Conf. Interval] |           |
|---------------|-----------|------------------|-------|-------|----------------------|-----------|
| t             | .0816206  | .0707587         | 1.15  | 0.249 | -.057064             | .2203052  |
| c.t#c.t       | -.0004477 | .0013209         | -0.34 | 0.735 | -.0030366            | .0021413  |
| mopd3         |           |                  |       |       |                      |           |
| PPD_Early     | -.064274  | 2.239971         | -0.03 | 0.977 | -4.454536            | 4.325988  |
| PPD_Late      | 6.469596  | 3.791699         | 1.71  | 0.088 | -.9619975            | 13.90119  |
| mopd3#c.t     |           |                  |       |       |                      |           |
| PPD_Early     | .1087433  | .1977273         | 0.55  | 0.582 | -.278795             | .4962816  |
| PPD_Late      | -.7392742 | .3509749         | -2.11 | 0.035 | -1.427172            | -.051376  |
| mopd3#c.t#c.t |           |                  |       |       |                      |           |
| PPD_Early     | -.0033495 | .0038155         | -0.88 | 0.380 | -.0108278            | .0041289  |
| PPD_Late      | .0110837  | .0068995         | 1.61  | 0.108 | -.0024392            | .0246066  |
| male          | -2.72596  | .4409966         | -6.18 | 0.000 | -3.590298            | -1.861623 |
| parit3        |           |                  |       |       |                      |           |
| 1             | -.4762288 | .4948588         | -0.96 | 0.336 | -1.446134            | .4936767  |
| 2+            | -.772158  | .6768952         | -1.14 | 0.254 | -2.098848            | .5545322  |
| twin          |           |                  |       |       |                      |           |
| bw            | .0030212  | .0006434         | 4.70  | 0.000 | .0017601             | .0042822  |
| ga            | .2469372  | .1928822         | 1.28  | 0.200 | -.1311049            | .6249794  |
| moag01        | .1058037  | .0719801         | 1.47  | 0.142 | -.0352746            | .2468821  |
| moed01        | .3516084  | .1217818         | 2.89  | 0.004 | .1129205             | .5902964  |
| faag01        | -.1323488 | .0598678         | -2.21 | 0.027 | -.2496875            | -.01501   |
| faed01        | .0331753  | .0977071         | 0.34  | 0.734 | -.1583272            | .2246777  |
| mopsyaafdfor0 | -.5891313 | .8224517         | -0.72 | 0.474 | -2.201107            | 1.022844  |

|              |           |          |       |       |           |          |
|--------------|-----------|----------|-------|-------|-----------|----------|
| mopsyanxfor0 | -2.290827 | 1.300984 | -1.76 | 0.078 | -4.840709 | .2590554 |
| bf           | .0838677  | .0359452 | 2.33  | 0.020 | .0134164  | .1543189 |
| _cons        | 25.6825   | 7.236295 | 3.55  | 0.000 | 11.49962  | 39.86538 |

| Random-effects Parameters | Estimate  | Robust Std. Err. | [95% Conf. Interval] |           |
|---------------------------|-----------|------------------|----------------------|-----------|
| <b>id: Unstructured</b>   |           |                  |                      |           |
| var(t)                    | .0896922  | .0089459         | .0737659             | .1090571  |
| var(_cons)                | 67.29316  | 5.707306         | 56.98733             | 79.46273  |
| cov(t,_cons)              | -1.722065 | .2057981         | -2.125422            | -1.318708 |
| var(Residual)             | 47.6264   | 1.39878          | 44.96226             | 50.4484   |

```

8 .
9 . log c
    name: <unnamed>
    log: C:\stata_datafolder\20180528_HBC\peerJ_log_table3.smcl
    log type: smcl
    closed on: 23 Oct 2018, 16:00:30

```



User: S Aoyagi  
Project: HBC study

name: <unnamed>  
log: C:\stata\_datafolder\20180528\_HBC\peerJ\_log\_supplemental\_table1.smcl  
log type: smcl  
opened on: 23 Oct 2018, 15:59:34

```
1 .
2 . * =====
3 . * Supplemental Table 1
4 . * =====
5 . tab mopd3
```

|                                                                                | Freq.      | Percent        | Cum.           |
|--------------------------------------------------------------------------------|------------|----------------|----------------|
| PPD-<br>Early/Late<br>0/No PPD<br>1/Early<br>PPD(2-4w)<br>2/Late<br>PPD(5-12w) |            |                |                |
| PPD-<br>PPD_Early                                                              | 823<br>103 | 84.93<br>10.63 | 84.93<br>95.56 |
| PPD_Late                                                                       | 43         | 4.44           | 100.00         |
| Total                                                                          | 969        | 100.00         |                |

```
6 . tab male mopd3, col
```

|                          |
|--------------------------|
| Key                      |
| <i>frequency</i>         |
| <i>column percentage</i> |

| Gender of the child | PPD-<br>PPD_Early | PPD Early/Late<br>PPD(2-4w)<br>2/Late<br>PPD(5-12w) | PPD-<br>PPD_Early<br>PPD_Late | Total         |
|---------------------|-------------------|-----------------------------------------------------|-------------------------------|---------------|
| 0/female<br>1/male  |                   |                                                     |                               |               |
| Female              | 403<br>48.97      | 56<br>54.37                                         | 19<br>44.19                   | 478<br>49.33  |
| Male                | 420<br>51.03      | 47<br>45.63                                         | 24<br>55.81                   | 491<br>50.67  |
| Total               | 823<br>100.00     | 103<br>100.00                                       | 43<br>100.00                  | 969<br>100.00 |

```
7 . tab parit3 mopd3, col
```

|                          |
|--------------------------|
| Key                      |
| <i>frequency</i>         |
| <i>column percentage</i> |

| Number of children born before | PPD-<br>PPD_Early | PPD Early/Late<br>PPD(2-4w)<br>2/Late<br>PPD(5-12w) | PPD-<br>PPD_Early<br>PPD_Late | Total        |
|--------------------------------|-------------------|-----------------------------------------------------|-------------------------------|--------------|
| 0/0<br>1/1 2/2+                |                   |                                                     |                               |              |
| 0                              | 394<br>47.87      | 69<br>66.99                                         | 22<br>51.16                   | 485<br>50.05 |
| 1                              | 318<br>38.64      | 29<br>28.16                                         | 16<br>37.21                   | 363<br>37.46 |
| 2+                             | 111<br>13.49      | 5<br>4.85                                           | 5<br>11.63                    | 121<br>12.49 |



|       |        |        |        |        |
|-------|--------|--------|--------|--------|
| Total | 823    | 103    | 43     | 969    |
|       | 100.00 | 100.00 | 100.00 | 100.00 |

8 . tab twin mopd3, col

|                                              |
|----------------------------------------------|
| Key                                          |
| <i>frequency</i><br><i>column percentage</i> |

| Twins/multiple births | PPD Early/Late 0/No PPD(2-4w) PPD- | PPD 1/Early 2/Late PPD_Early | PPD 1/Early PPD(5-12w) PPD_Late | Total         |
|-----------------------|------------------------------------|------------------------------|---------------------------------|---------------|
| 0                     | 801<br>97.33                       | 101<br>98.06                 | 37<br>86.05                     | 939<br>96.90  |
| 1                     | 22<br>2.67                         | 2<br>1.94                    | 6<br>13.95                      | 30<br>3.10    |
| Total                 | 823<br>100.00                      | 103<br>100.00                | 43<br>100.00                    | 969<br>100.00 |

9 . tab bf3 mopd3, col

|                                              |
|----------------------------------------------|
| Key                                          |
| <i>frequency</i><br><i>column percentage</i> |

| RECODE of bf | PPD Early/Late 0/No PPD(2-4w) PPD- | PPD 1/Early 2/Late PPD_Early | PPD 1/Early PPD(5-12w) PPD_Late | Total         |
|--------------|------------------------------------|------------------------------|---------------------------------|---------------|
| 0            | 41<br>4.98                         | 10<br>9.71                   | 4<br>9.30                       | 55<br>5.68    |
| 1            | 188<br>22.84                       | 28<br>27.18                  | 7<br>16.28                      | 223<br>23.01  |
| 2            | 594<br>72.17                       | 65<br>63.11                  | 32<br>74.42                     | 691<br>71.31  |
| Total        | 823<br>100.00                      | 103<br>100.00                | 43<br>100.00                    | 969<br>100.00 |

10 . tab mopsyafdfor0 mopd3, col

|                                              |
|----------------------------------------------|
| Key                                          |
| <i>frequency</i><br><i>column percentage</i> |

| Maternal LIFETIME Affect Disord BY the index preg (29600-99) | PPD Early/Late 0/No PPD(2-4w) PPD- | PPD 1/Early 2/Late PPD_Early | PPD 1/Early PPD(5-12w) PPD_Late | Total        |
|--------------------------------------------------------------|------------------------------------|------------------------------|---------------------------------|--------------|
| No                                                           | 756<br>91.86                       | 78<br>75.73                  | 36<br>83.72                     | 870<br>89.78 |
| Yes                                                          | 67<br>8.14                         | 25<br>24.27                  | 7<br>16.28                      | 99<br>10.22  |

|       |        |        |        |        |
|-------|--------|--------|--------|--------|
| Total | 823    | 103    | 43     | 969    |
|       | 100.00 | 100.00 | 100.00 | 100.00 |

11 . tab mopsyaxfor0 mopd3, col

|                                              |
|----------------------------------------------|
| Key                                          |
| <i>frequency</i><br><i>column percentage</i> |

| Maternal<br>LIFETIME<br>Anxiety<br>Disord BY<br>the index<br>preg<br>(30000/300<br>41:30928) | PPD Early/Late 0/No PPD 1/Early<br>PPD(2-4w) 2/Late PPD(5-12w) |               |              | Total         |
|----------------------------------------------------------------------------------------------|----------------------------------------------------------------|---------------|--------------|---------------|
|                                                                                              | PPD-                                                           | PPD_Early     | PPD_Late     |               |
| No                                                                                           | 796<br>96.72                                                   | 96<br>93.20   | 42<br>97.67  | 934<br>96.39  |
| Yes                                                                                          | 27<br>3.28                                                     | 7<br>6.80     | 1<br>2.33    | 35<br>3.61    |
| Total                                                                                        | 823<br>100.00                                                  | 103<br>100.00 | 43<br>100.00 | 969<br>100.00 |

12 . tab mopsyafdfor40 mopd3, col

|                                              |
|----------------------------------------------|
| Key                                          |
| <i>frequency</i><br><i>column percentage</i> |

| Maternal<br>LIFETIME<br>Affect<br>Disord<br>during<br>0-40M<br>(29600-99) | PPD Early/Late 0/No PPD 1/Early<br>PPD(2-4w) 2/Late PPD(5-12w) |               |              | Total         |
|---------------------------------------------------------------------------|----------------------------------------------------------------|---------------|--------------|---------------|
|                                                                           | PPD-                                                           | PPD_Early     | PPD_Late     |               |
| No                                                                        | 724<br>87.97                                                   | 63<br>61.17   | 32<br>74.42  | 819<br>84.52  |
| Yes                                                                       | 99<br>12.03                                                    | 40<br>38.83   | 11<br>25.58  | 150<br>15.48  |
| Total                                                                     | 823<br>100.00                                                  | 103<br>100.00 | 43<br>100.00 | 969<br>100.00 |

13 . tab mopsyaxfor40 mopd3, col

|                                              |
|----------------------------------------------|
| Key                                          |
| <i>frequency</i><br><i>column percentage</i> |

| Maternal<br>LIFETIME<br>Anxiety<br>Disord<br>during<br>0-40M<br>(30000/300<br>41:30928) | PPD Early/Late 0/No PPD 1/Early<br>PPD(2-4w) 2/Late PPD(5-12w) |               |              | Total         |
|-----------------------------------------------------------------------------------------|----------------------------------------------------------------|---------------|--------------|---------------|
|                                                                                         | PPD-                                                           | PPD_Early     | PPD_Late     |               |
| No                                                                                      | 784<br>95.26                                                   | 92<br>89.32   | 40<br>93.02  | 916<br>94.53  |
| Yes                                                                                     | 39<br>4.74                                                     | 11<br>10.68   | 3<br>6.98    | 53<br>5.47    |
| Total                                                                                   | 823<br>100.00                                                  | 103<br>100.00 | 43<br>100.00 | 969<br>100.00 |

14 .  
15 . codebook mopd3

---

**mopd3**

---

```

type: numeric (float)
label: labppd3

range: [0,2]
unique values: 3

units: 1
missing .: 0/969
    
```

```

tabulation: Freq.   Numeric   Label
              823         0   PPD-
              103         1   PPD_Early
               43         2   PPD_Late
    
```

16 . sum bw if mopd3 ==0

| Variable | Obs | Mean     | Std. Dev. | Min | Max  |
|----------|-----|----------|-----------|-----|------|
| bw       | 823 | 2955.039 | 438.0591  | 946 | 4286 |

17 . sum bw if mopd3 ==1

| Variable | Obs | Mean     | Std. Dev. | Min  | Max  |
|----------|-----|----------|-----------|------|------|
| bw       | 103 | 2881.883 | 427.2487  | 1448 | 3870 |

18 . sum bw if mopd3 ==2

| Variable | Obs | Mean     | Std. Dev. | Min  | Max  |
|----------|-----|----------|-----------|------|------|
| bw       | 43  | 2880.093 | 413.1134  | 1808 | 3544 |

19 .  
20 . sum ga if mopd3 ==0

| Variable | Obs | Mean     | Std. Dev. | Min   | Max   |
|----------|-----|----------|-----------|-------|-------|
| ga       | 823 | 38.97111 | 1.513979  | 30.14 | 42.14 |

21 . sum ga if mopd3 ==1

| Variable | Obs | Mean     | Std. Dev. | Min   | Max   |
|----------|-----|----------|-----------|-------|-------|
| ga       | 103 | 39.05102 | 1.364484  | 35.28 | 41.28 |

22 . sum ga if mopd3 ==2

| Variable | Obs | Mean     | Std. Dev. | Min | Max   |
|----------|-----|----------|-----------|-----|-------|
| ga       | 43  | 38.69372 | 1.437773  | 35  | 41.14 |

23 .

24 . sum moag01 if mopd3 ==0

| Variable | Obs | Mean     | Std. Dev. | Min     | Max      |
|----------|-----|----------|-----------|---------|----------|
| moag01   | 823 | 31.72443 | 4.999849  | 17.7358 | 44.55578 |

25 . sum moag01 if mopd3 ==1

| Variable | Obs | Mean     | Std. Dev. | Min     | Max      |
|----------|-----|----------|-----------|---------|----------|
| moag01   | 103 | 31.51378 | 4.996454  | 20.0219 | 41.18823 |

26 . sum moag01 if mopd3 ==2

| Variable | Obs | Mean     | Std. Dev. | Min      | Max      |
|----------|-----|----------|-----------|----------|----------|
| moag01   | 43  | 32.71261 | 5.549553  | 20.72553 | 40.68446 |

27 .

28 . sum moed01 if mopd3 ==0

| Variable | Obs | Mean    | Std. Dev. | Min | Max |
|----------|-----|---------|-----------|-----|-----|
| moed01   | 823 | 13.9514 | 1.911056  | 9   | 22  |

29 . sum moed01 if mopd3 ==1

| Variable | Obs | Mean     | Std. Dev. | Min | Max |
|----------|-----|----------|-----------|-----|-----|
| moed01   | 103 | 13.83495 | 1.980776  | 9   | 23  |

30 . sum moed01 if mopd3 ==2

| Variable | Obs | Mean     | Std. Dev. | Min | Max |
|----------|-----|----------|-----------|-----|-----|
| moed01   | 43  | 14.18605 | 1.854927  | 12  | 18  |

31 .

32 . sum faag01 if mopd3 ==0

| Variable | Obs | Mean    | Std. Dev. | Min     | Max     |
|----------|-----|---------|-----------|---------|---------|
| faag01   | 823 | 33.5928 | 5.708739  | 19.6167 | 53.4319 |

33 . sum faag01 if mopd3 ==1

| Variable | Obs | Mean     | Std. Dev. | Min     | Max      |
|----------|-----|----------|-----------|---------|----------|
| faag01   | 103 | 32.82113 | 5.658045  | 18.8501 | 52.32033 |

34 . sum faag01 if mopd3 ==2

| Variable | Obs | Mean     | Std. Dev. | Min      | Max      |
|----------|-----|----------|-----------|----------|----------|
| faag01   | 43  | 34.49335 | 6.900537  | 20.51472 | 48.32581 |

35 .

36 . sum faed01 if mopd3 ==0

| Variable | Obs | Mean     | Std. Dev. | Min | Max |
|----------|-----|----------|-----------|-----|-----|
| faed01   | 823 | 14.29648 | 2.677213  | 9   | 26  |

37 . sum faed01 if mopd3 ==1

| Variable | Obs | Mean     | Std. Dev. | Min | Max |
|----------|-----|----------|-----------|-----|-----|
| faed01   | 103 | 13.94175 | 2.36322   | 9   | 23  |

38 . sum faed01 if mopd3 ==2

| Variable | Obs | Mean     | Std. Dev. | Min | Max |
|----------|-----|----------|-----------|-----|-----|
| faed01   | 43  | 14.11628 | 2.470871  | 9   | 22  |

39 .

40 . sum bf if mopd3 ==0

| Variable | Obs | Mean     | Std. Dev. | Min | Max   |
|----------|-----|----------|-----------|-----|-------|
| bf       | 823 | 9.976027 | 6.136888  | 0   | 22.15 |

41 . sum bf if mopd3 ==1

| Variable | Obs | Mean     | Std. Dev. | Min | Max   |
|----------|-----|----------|-----------|-----|-------|
| bf       | 103 | 8.620097 | 6.3209    | 0   | 23.07 |

42 . sum bf if mopd3 ==2

| Variable | Obs | Mean     | Std. Dev. | Min | Max   |
|----------|-----|----------|-----------|-----|-------|
| bf       | 43  | 9.280698 | 6.04404   | 0   | 18.63 |

43 .

44 . sum mlelt10 if mopd3 ==0

| Variable | Obs | Mean     | Std. Dev. | Min      | Max      |
|----------|-----|----------|-----------|----------|----------|
| mlelt10  | 774 | 48.01591 | 9.627509  | 25.22819 | 78.67344 |

45 . sum mlelt10 if mopd3 ==1

| Variable | Obs | Mean     | Std. Dev. | Min      | Max      |
|----------|-----|----------|-----------|----------|----------|
| mlelt10  | 99  | 49.11174 | 9.910802  | 26.43362 | 77.44672 |

46 . sum mlelt10 if mopd3 ==2

| Variable | Obs | Mean     | Std. Dev. | Min      | Max      |
|----------|-----|----------|-----------|----------|----------|
| mlelt10  | 41  | 47.52445 | 10.35178  | 24.11217 | 66.19521 |

47 .

48 . sum mlelt14 if mopd3 ==0

| Variable | Obs | Mean     | Std. Dev. | Min | Max      |
|----------|-----|----------|-----------|-----|----------|
| mlelt14  | 718 | 49.25063 | 10.53127  | 20  | 70.43153 |

49 . sum mlelt14 if mopd3 ==1

| Variable | Obs | Mean     | Std. Dev. | Min      | Max      |
|----------|-----|----------|-----------|----------|----------|
| mlelt14  | 94  | 49.08838 | 10.1407   | 23.33756 | 66.41338 |

50 . sum mlelt14 if mopd3 ==2

| Variable | Obs | Mean     | Std. Dev. | Min | Max      |
|----------|-----|----------|-----------|-----|----------|
| mlelt14  | 37  | 47.28451 | 10.53487  | 20  | 64.74017 |

51 .

52 . sum mlelt18 if mopd3 ==0

| Variable | Obs | Mean     | Std. Dev. | Min | Max      |
|----------|-----|----------|-----------|-----|----------|
| mlelt18  | 770 | 48.69992 | 9.358142  | 20  | 76.60195 |

53 . sum mlelt18 if mopd3 ==1

| Variable | Obs | Mean     | Std. Dev. | Min | Max      |
|----------|-----|----------|-----------|-----|----------|
| mlelt18  | 91  | 49.44902 | 9.691576  | 20  | 68.54506 |

54 . sum mlelt18 if mopd3 ==2

| Variable | Obs | Mean     | Std. Dev. | Min | Max      |
|----------|-----|----------|-----------|-----|----------|
| mlelt18  | 37  | 44.03257 | 11.84964  | 20  | 63.92603 |

55 .

56 . sum mlelt24 if mopd3 ==0

| Variable | Obs | Mean     | Std. Dev. | Min | Max      |
|----------|-----|----------|-----------|-----|----------|
| mlelt24  | 743 | 49.69395 | 9.817472  | 20  | 78.44915 |

57 . sum mlelt24 if mopd3 ==1

| Variable | Obs | Mean     | Std. Dev. | Min      | Max |
|----------|-----|----------|-----------|----------|-----|
| mlelt24  | 93  | 50.22527 | 9.843545  | 22.62097 | 80  |

58 . sum mlelt24 if mopd3 ==2

| Variable | Obs | Mean     | Std. Dev. | Min | Max      |
|----------|-----|----------|-----------|-----|----------|
| mlelt24  | 38  | 42.81276 | 10.35191  | 20  | 57.73434 |

59 .

60 . sum mlelt32 if mopd3 ==0

| Variable | Obs | Mean     | Std. Dev. | Min | Max |
|----------|-----|----------|-----------|-----|-----|
| mlelt32  | 725 | 49.51587 | 9.952311  | 20  | 80  |

61 . sum mlelt32 if mopd3 ==1

| Variable | Obs | Mean     | Std. Dev. | Min      | Max      |
|----------|-----|----------|-----------|----------|----------|
| mlelt32  | 87  | 49.62434 | 8.892301  | 27.24406 | 70.68181 |

62 . sum mlelt32 if mopd3 ==2

| Variable | Obs | Mean     | Std. Dev. | Min | Max      |
|----------|-----|----------|-----------|-----|----------|
| mlelt32  | 37  | 43.76154 | 10.6808   | 20  | 67.57412 |

63 .

64 . sum mlelt40 if mopd3 ==0

| Variable | Obs | Mean     | Std. Dev. | Min | Max      |
|----------|-----|----------|-----------|-----|----------|
| mlelt40  | 730 | 50.47839 | 10.15976  | 20  | 78.53828 |

65 . sum mlelt40 if mopd3 ==1

| Variable | Obs | Mean     | Std. Dev. | Min | Max      |
|----------|-----|----------|-----------|-----|----------|
| mlelt40  | 91  | 49.01259 | 10.06591  | 20  | 77.74355 |

66 . sum mlelt40 if mopd3 ==2

| Variable | Obs | Mean     | Std. Dev. | Min | Max      |
|----------|-----|----------|-----------|-----|----------|
| mlelt40  | 38  | 43.59106 | 11.03924  | 20  | 65.74768 |

67 .

68 . sum hbcml0 if mopd3 ==0

| Variable | Obs | Mean     | Std. Dev. | Min | Max   |
|----------|-----|----------|-----------|-----|-------|
| hbcml0   | 793 | 10.43852 | .4732154  | 9.2 | 13.41 |

69 . sum hbcml0 if mopd3 ==1

| Variable | Obs | Mean     | Std. Dev. | Min  | Max   |
|----------|-----|----------|-----------|------|-------|
| hbcml0   | 102 | 10.49029 | .4696353  | 9.82 | 11.93 |

70 . sum hbcml0 if mopd3 ==2

| Variable | Obs | Mean     | Std. Dev. | Min  | Max   |
|----------|-----|----------|-----------|------|-------|
| hbcml0   | 41  | 10.63732 | .6902428  | 9.96 | 13.11 |

71 .

72 . sum hbcml4 if mopd3 ==0

| Variable | Obs | Mean     | Std. Dev. | Min   | Max   |
|----------|-----|----------|-----------|-------|-------|
| hbcml4   | 746 | 14.50909 | .6474789  | 12.13 | 20.64 |

73 . sum hbcml4 if mopd3 ==1

| Variable | Obs | Mean     | Std. Dev. | Min   | Max   |
|----------|-----|----------|-----------|-------|-------|
| hbcml4   | 95  | 14.46737 | .5728321  | 13.28 | 17.58 |

74 . sum hbcm14 if mopd3 ==2

| Variable | Obs | Mean     | Std. Dev. | Min   | Max   |
|----------|-----|----------|-----------|-------|-------|
| hbcm14   | 38  | 14.66737 | .6567598  | 13.87 | 16.37 |

75 .

76 . sum hbcm18 if mopd3 ==0

| Variable | Obs | Mean     | Std. Dev. | Min  | Max  |
|----------|-----|----------|-----------|------|------|
| hbcm18   | 789 | 18.59749 | .7118261  | 16.6 | 23.2 |

77 . sum hbcm18 if mopd3 ==1

| Variable | Obs | Mean     | Std. Dev. | Min   | Max   |
|----------|-----|----------|-----------|-------|-------|
| hbcm18   | 97  | 18.76392 | .8572504  | 17.48 | 23.07 |

78 . sum hbcm18 if mopd3 ==2

| Variable | Obs | Mean     | Std. Dev. | Min   | Max   |
|----------|-----|----------|-----------|-------|-------|
| hbcm18   | 38  | 18.59658 | .5727426  | 17.78 | 20.54 |

79 .

80 . sum hbcm24 if mopd3 ==0

| Variable | Obs | Mean    | Std. Dev. | Min   | Max   |
|----------|-----|---------|-----------|-------|-------|
| hbcm24   | 777 | 24.6999 | .9156065  | 21.03 | 33.82 |

81 . sum hbcm24 if mopd3 ==1

| Variable | Obs | Mean     | Std. Dev. | Min   | Max   |
|----------|-----|----------|-----------|-------|-------|
| hbcm24   | 95  | 24.83832 | 1.062347  | 22.74 | 29.52 |

82 . sum hbcm24 if mopd3 ==2

| Variable | Obs | Mean   | Std. Dev. | Min   | Max   |
|----------|-----|--------|-----------|-------|-------|
| hbcm24   | 40  | 24.977 | 1.139431  | 23.53 | 29.52 |

83 .

84 . sum hbcm32 if mopd3 ==0

| Variable | Obs | Mean    | Std. Dev. | Min   | Max   |
|----------|-----|---------|-----------|-------|-------|
| hbcm32   | 755 | 33.1773 | 2.018118  | 28.79 | 59.63 |

85 . sum hbcm32 if mopd3 ==1

| Variable | Obs | Mean     | Std. Dev. | Min   | Max   |
|----------|-----|----------|-----------|-------|-------|
| hbcm32   | 89  | 33.45315 | 1.729674  | 31.16 | 43.88 |

86 . sum hbcm32 if mopd3 ==2

| Variable | Obs | Mean     | Std. Dev. | Min   | Max   |
|----------|-----|----------|-----------|-------|-------|
| hbcm32   | 39  | 33.14923 | 1.403524  | 29.52 | 36.32 |



87 .

88 . sum hbcm40 if mopd3 ==0

| Variable | Obs | Mean     | Std. Dev. | Min   | Max   |
|----------|-----|----------|-----------|-------|-------|
| hbcm40   | 753 | 39.78726 | 2.196944  | 32.77 | 59.63 |

89 . sum hbcm40 if mopd3 ==1

| Variable | Obs | Mean     | Std. Dev. | Min   | Max   |
|----------|-----|----------|-----------|-------|-------|
| hbcm40   | 92  | 40.21652 | 2.306889  | 37.01 | 54.56 |

90 . sum hbcm40 if mopd3 ==2

| Variable | Obs | Mean     | Std. Dev. | Min   | Max   |
|----------|-----|----------|-----------|-------|-------|
| hbcm40   | 39  | 39.59795 | 1.179592  | 35.33 | 42.63 |

91 .

92 . sum epdsw2 if mopd3 ==0

| Variable | Obs | Mean     | Std. Dev. | Min | Max  |
|----------|-----|----------|-----------|-----|------|
| epdsw2   | 821 | 2.266882 | .3640507  | .71 | 4.71 |

93 . sum epdsw2 if mopd3 ==1

| Variable | Obs | Mean     | Std. Dev. | Min | Max  |
|----------|-----|----------|-----------|-----|------|
| epdsw2   | 103 | 2.329806 | .4295551  | .85 | 3.71 |

94 . sum epdsw2 if mopd3 ==2

| Variable | Obs | Mean     | Std. Dev. | Min  | Max  |
|----------|-----|----------|-----------|------|------|
| epdsw2   | 43  | 2.353954 | .3887473  | 1.71 | 3.42 |

95 .

96 . sum epdsw4 if mopd3 ==0

| Variable | Obs | Mean    | Std. Dev. | Min  | Max   |
|----------|-----|---------|-----------|------|-------|
| epdsw4   | 823 | 4.43339 | .8219726  | 2.71 | 11.57 |

97 . sum epdsw4 if mopd3 ==1

| Variable | Obs | Mean    | Std. Dev. | Min  | Max  |
|----------|-----|---------|-----------|------|------|
| epdsw4   | 103 | 4.30699 | .3994699  | 3.42 | 5.71 |

98 . sum epdsw4 if mopd3 ==2

| Variable | Obs | Mean     | Std. Dev. | Min  | Max  |
|----------|-----|----------|-----------|------|------|
| epdsw4   | 43  | 4.516512 | 1.18352   | 3.28 | 8.85 |

99 .

100 . sum epdsw10 if mopd3 ==0

| Variable | Obs | Mean     | Std. Dev. | Min  | Max   |
|----------|-----|----------|-----------|------|-------|
| epdsw10  | 678 | 8.600959 | 1.10712   | 4.28 | 19.14 |

101 . sum epdsw10 if mopd3 ==1

| Variable | Obs | Mean     | Std. Dev. | Min  | Max   |
|----------|-----|----------|-----------|------|-------|
| epdsw10  | 85  | 8.522588 | .8013086  | 6.14 | 11.42 |

102 . sum epdsw10 if mopd3 ==2

| Variable | Obs | Mean     | Std. Dev. | Min  | Max   |
|----------|-----|----------|-----------|------|-------|
| epdsw10  | 39  | 8.562308 | .6886503  | 7.42 | 11.28 |

103 .

104 . sum mopd01 if mopd3 ==0

| Variable | Obs | Mean     | Std. Dev. | Min | Max |
|----------|-----|----------|-----------|-----|-----|
| mopd01   | 821 | 2.783191 | 2.162149  | 0   | 8   |

105 . sum mopd01 if mopd3 ==1

| Variable | Obs | Mean     | Std. Dev. | Min | Max |
|----------|-----|----------|-----------|-----|-----|
| mopd01   | 103 | 11.68932 | 3.013138  | 5   | 22  |

106 . sum mopd01 if mopd3 ==2

| Variable | Obs | Mean     | Std. Dev. | Min | Max |
|----------|-----|----------|-----------|-----|-----|
| mopd01   | 43  | 5.744186 | 1.513322  | 2   | 8   |

107 .

108 . sum mopd02 if mopd3 ==0

| Variable | Obs | Mean     | Std. Dev. | Min | Max |
|----------|-----|----------|-----------|-----|-----|
| mopd02   | 823 | 2.153098 | 2.085376  | 0   | 8   |

109 . sum mopd02 if mopd3 ==1

| Variable | Obs | Mean     | Std. Dev. | Min | Max |
|----------|-----|----------|-----------|-----|-----|
| mopd02   | 103 | 8.320388 | 5.080168  | 0   | 21  |

110 . sum mopd02 if mopd3 ==2

| Variable | Obs | Mean     | Std. Dev. | Min | Max |
|----------|-----|----------|-----------|-----|-----|
| mopd02   | 43  | 7.813953 | 4.272034  | 1   | 18  |

111 .

112 . sum mopd03 if mopd3 ==0

| Variable | Obs | Mean     | Std. Dev. | Min | Max |
|----------|-----|----------|-----------|-----|-----|
| mopd03   | 678 | 1.806785 | 1.97012   | 0   | 8   |

113 . sum mopd03 if mopd3 ==1

| Variable | Obs | Mean     | Std. Dev. | Min | Max |
|----------|-----|----------|-----------|-----|-----|
| mopd03   | 85  | 6.058824 | 5.162486  | 0   | 28  |

114 . sum mopd03 if mopd3 ==2

| Variable | Obs | Mean    | Std. Dev. | Min | Max |
|----------|-----|---------|-----------|-----|-----|
| mopd03   | 39  | 8.74359 | 4.050458  | 1   | 19  |

115 .

116 . log c

name: <unnamed>  
log: C:\stata\_datafolder\20180528\_HBC\peerJ\_log\_supplemental\_table1.smcl  
log type: smcl  
closed on: 23 Oct 2018, 15:59:34

---
